# Supplementary material
Source: PubMed Central journal article supplement (PMC4277304)

• Good Cognitive Performers      • Poor Cognitive Performers

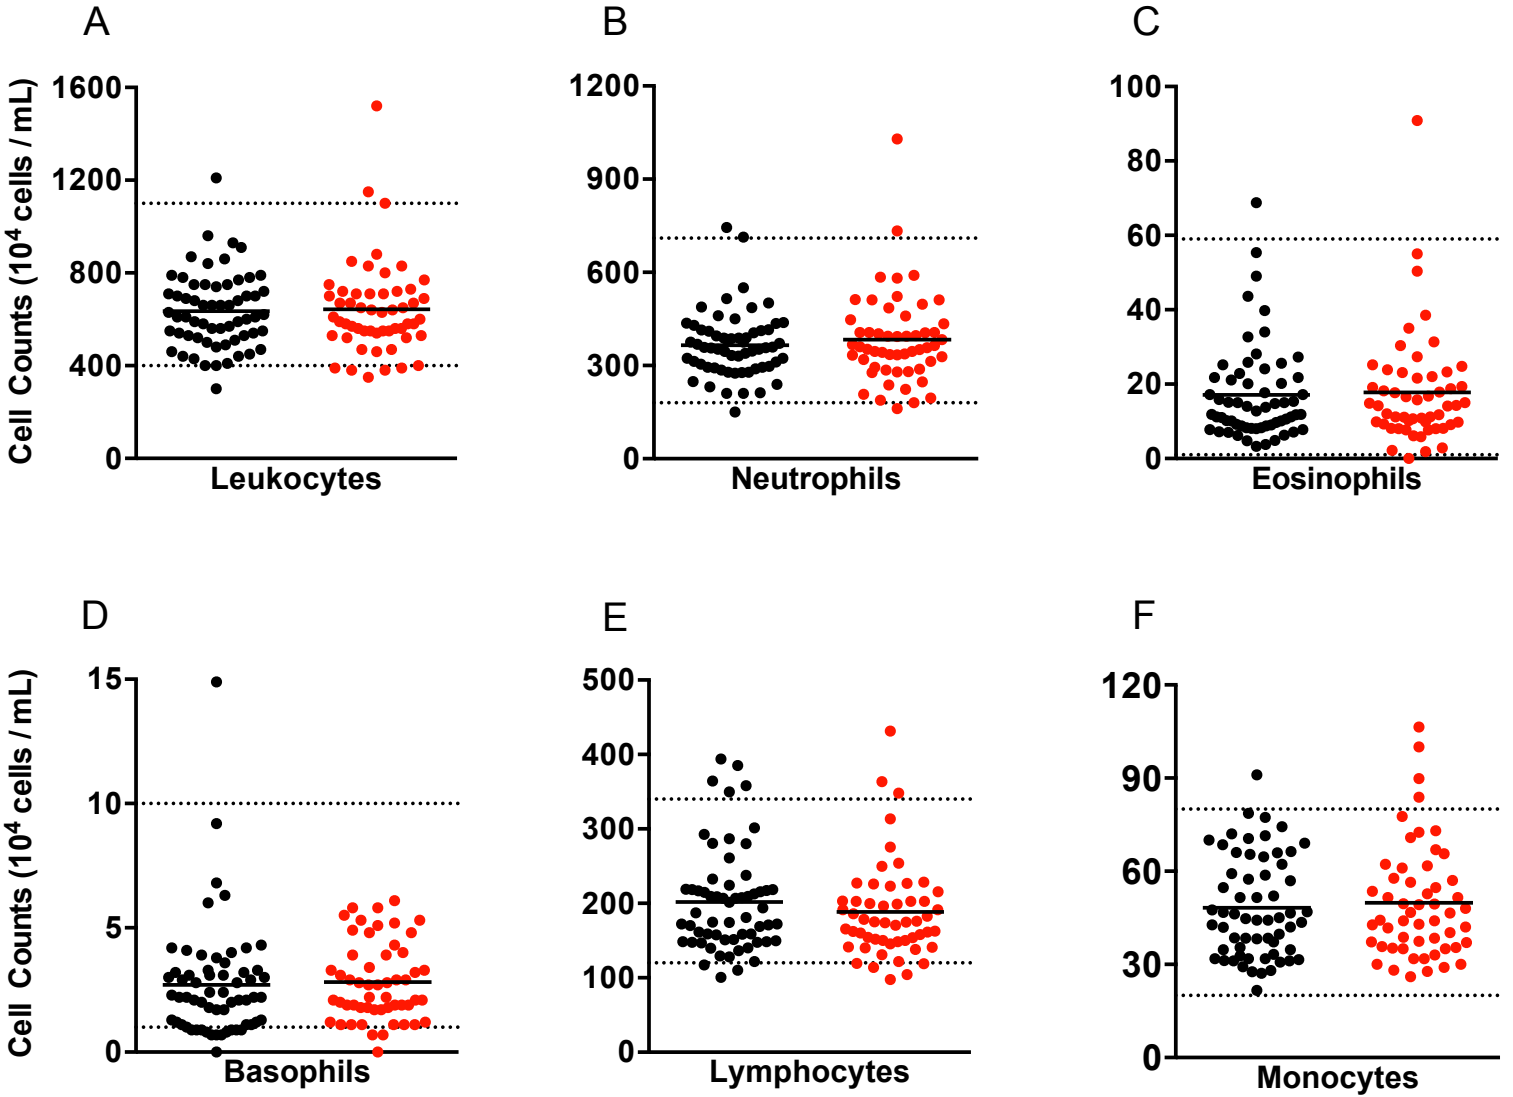

Supplement: supp_2.1.e54_Figure_e-1.pdf [file supp_2.1.e54_Figure_e-1.pdf]

• Good Cognitive Performers

• Poor Cognitive Performers

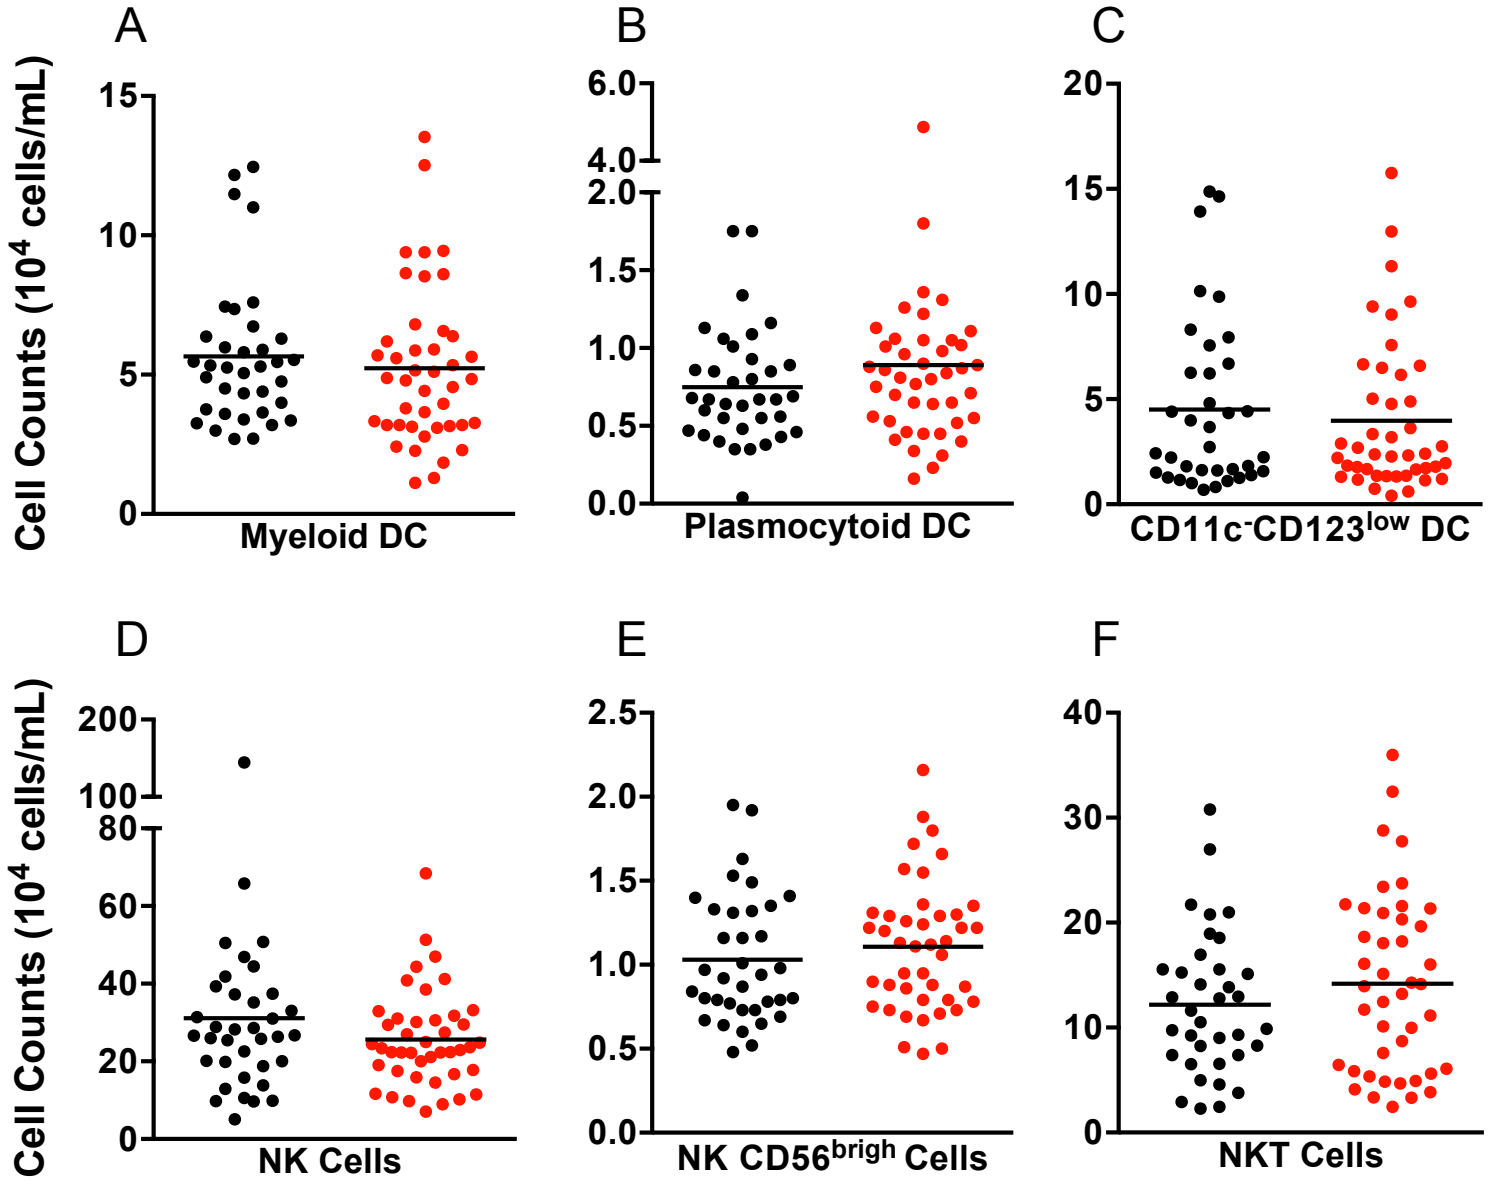

Supplement: supp_2.1.e54_Figure_e-2.pdf [file supp_2.1.e54_Figure_e-2.pdf]
